# Supplementary material for: Antiviral Effects of Secondary Metabolites from Jatropha podagrica Leaves against the Pseudotyped Virus of SARS-CoV-2 Omicron
Source: MDPI journal article supplement (doi:10.3390/plants12233942), 2023-11-23

## Supplementary Materials

---

### Antiviral Effects of Secondary Metabolites from *Jatropha podagrica* Leaves against the Pseudotyped Virus of SARS-CoV-2 Omicron

Yoon Seo Jang <sup>1,†</sup>, Da Eun Lee <sup>1,†</sup>, Dong U Ju <sup>2,3,†</sup>, Se Yun Jeong <sup>1</sup>, Yoon-Joo Ko <sup>4</sup>, Changhyun Pang <sup>5</sup>, Ki Sung Kang <sup>6</sup>, Hui-Jeong Gwon <sup>7</sup>, Hee Min Yoo <sup>2,8,\*</sup> and Ki Hyun Kim <sup>1,\*</sup>

<sup>1</sup>*School of Pharmacy, Sungkyunkwan University, Suwon 16419, Republic of Korea; bbj0423@gmail.com (Y.S.J.); allag8201@naver.com (D.E.L.); dlawtkark@naver.com (S.Y.J.)*

<sup>2</sup>*Biometrology Group, Korea Research Institute of Standards and Science (KRISS), Daejeon 34113, Republic of Korea; dongwoo0420@korea.ac.kr*

<sup>3</sup>*School of Biomedical Engineering, Korea University, Seoul 02841, Republic of Korea*

<sup>4</sup>*Laboratory of Nuclear Magnetic Resonance, National Center for Inter-University Research Facilities (NCIRF), Seoul National University, Gwanak-gu, Seoul 08826, Republic of Korea; yjko@snu.ac.kr*

<sup>5</sup>*School of Chemical Engineering, Sungkyunkwan University, Suwon 16419, Republic of Korea; chpang@skku.edu*

<sup>6</sup>*College of Korean Medicine, Gachon University, Seongnam 13120, Republic of Korea; kkang@gachon.ac.kr*

<sup>7</sup>*Advanced Radiation Technology Institute, Korea Atomic Energy Research Institute, Jeongseup 56212 Republic of Korea; hjgwon@kari.ac.kr*

<sup>8</sup>*Department of Precision Measurement, University of Science and Technology (UST), Daejeon 34113, Republic of Korea*

*\*Correspondence: hmy@kriiss.re.kr (H.M.Y.); khkim83@skku.edu (K.H.K.); Tel.: +82-31-290-7700 (K.H.K.)*

*†These authors contributed equally to this study.*

**Supporting Information Contents:**

|                                                                                                        |     |
|--------------------------------------------------------------------------------------------------------|-----|
| <b>Figure S1.</b> The chiral phase HPLC chromatography of compound <b>1</b> .....                      | S3  |
| <b>Figure S2.</b> UV chromatogram of LC/MS, and UV and MS data for compound <b>1</b> .....             | S4  |
| <b>Figure S3.</b> The $^1\text{H}$ NMR spectrum of <b>1</b> ( $\text{CD}_3\text{OD}$ , 850 MHz) .....  | S5  |
| <b>Figure S4.</b> The HSQC spectrum of <b>1</b> ( $\text{CD}_3\text{OD}$ ) .....                       | S6  |
| <b>Figure S5.</b> The HMBC spectrum of <b>1</b> ( $\text{CD}_3\text{OD}$ ) .....                       | S7  |
| <b>Figure S6.</b> UV chromatogram of LC/MS, and UV and MS data for compound <b>2</b> .....             | S8  |
| <b>Figure S7.</b> The $^1\text{H}$ NMR spectrum of <b>2</b> ( $\text{CD}_3\text{OD}$ , 850 MHz) .....  | S9  |
| <b>Figure S8.</b> UV chromatogram of LC/MS, and UV and MS data for compound <b>3</b> .....             | S10 |
| <b>Figure S9.</b> The $^1\text{H}$ NMR spectrum of <b>3</b> ( $\text{CD}_3\text{OD}$ , 850 MHz) .....  | S11 |
| <b>Figure S10.</b> UV chromatogram of LC/MS, and UV and MS data for compound <b>4</b> .....            | S12 |
| <b>Figure S11.</b> The $^1\text{H}$ NMR spectrum of <b>4</b> ( $\text{CD}_3\text{OD}$ , 850 MHz) ..... | S13 |
| <b>Figure S12.</b> UV chromatogram of LC/MS, and UV and MS data for compound <b>5</b> .....            | S14 |
| <b>Figure S13.</b> The $^1\text{H}$ NMR spectrum of <b>5</b> ( $\text{CD}_3\text{OD}$ , 850 MHz) ..... | S15 |

**Figure S1.** The chiral phase HPLC chromatography of compound **1**

Column: CHIRALPARK<sup>®</sup> OZ-3 LC column (250 × 4.6 mm i.d., 3 μm, Daicel Corporation, Osaka, Japan)

Flow rate: 0.5 mL/min

Mobile phase: 60:40:0.1 (Hexanes/*i*ProH/Formic Acid)

Injection: 10 μL

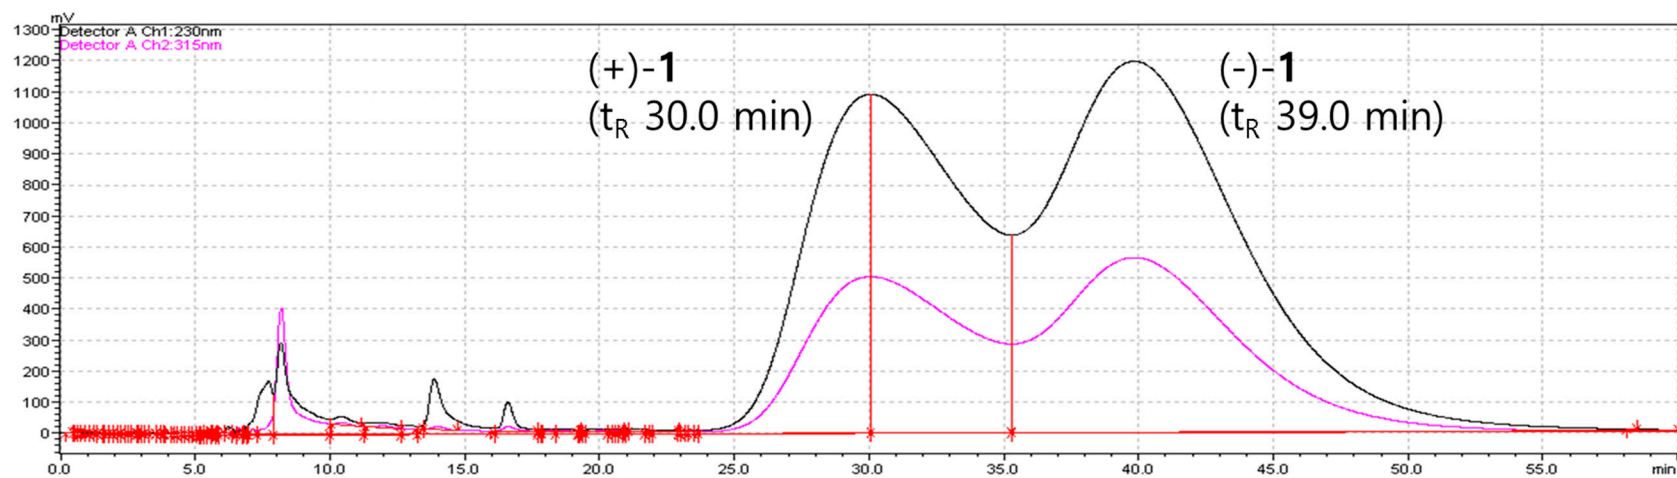

**Figure S2.** UV chromatogram of LC/MS, and UV and MS data for compound **1**

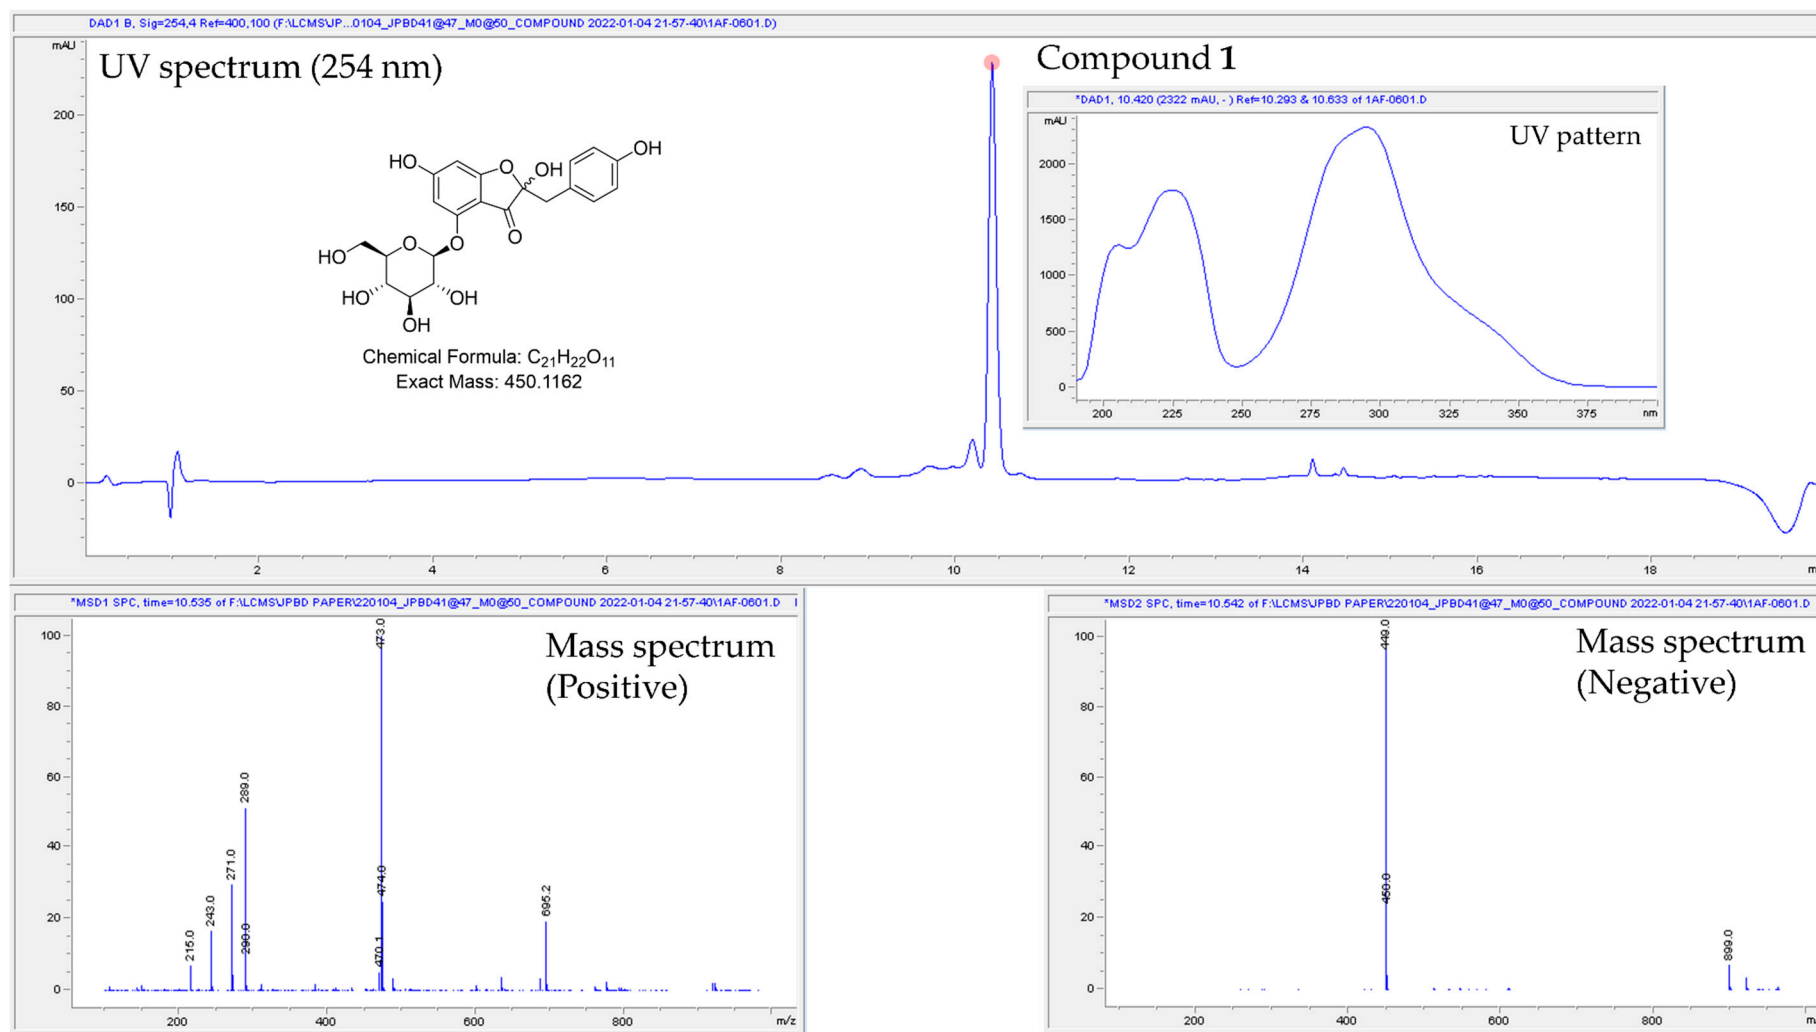

**Figure S3.** The  $^1\text{H}$  NMR spectrum of **1** ( $\text{CD}_3\text{OD}$ , 850 MHz)

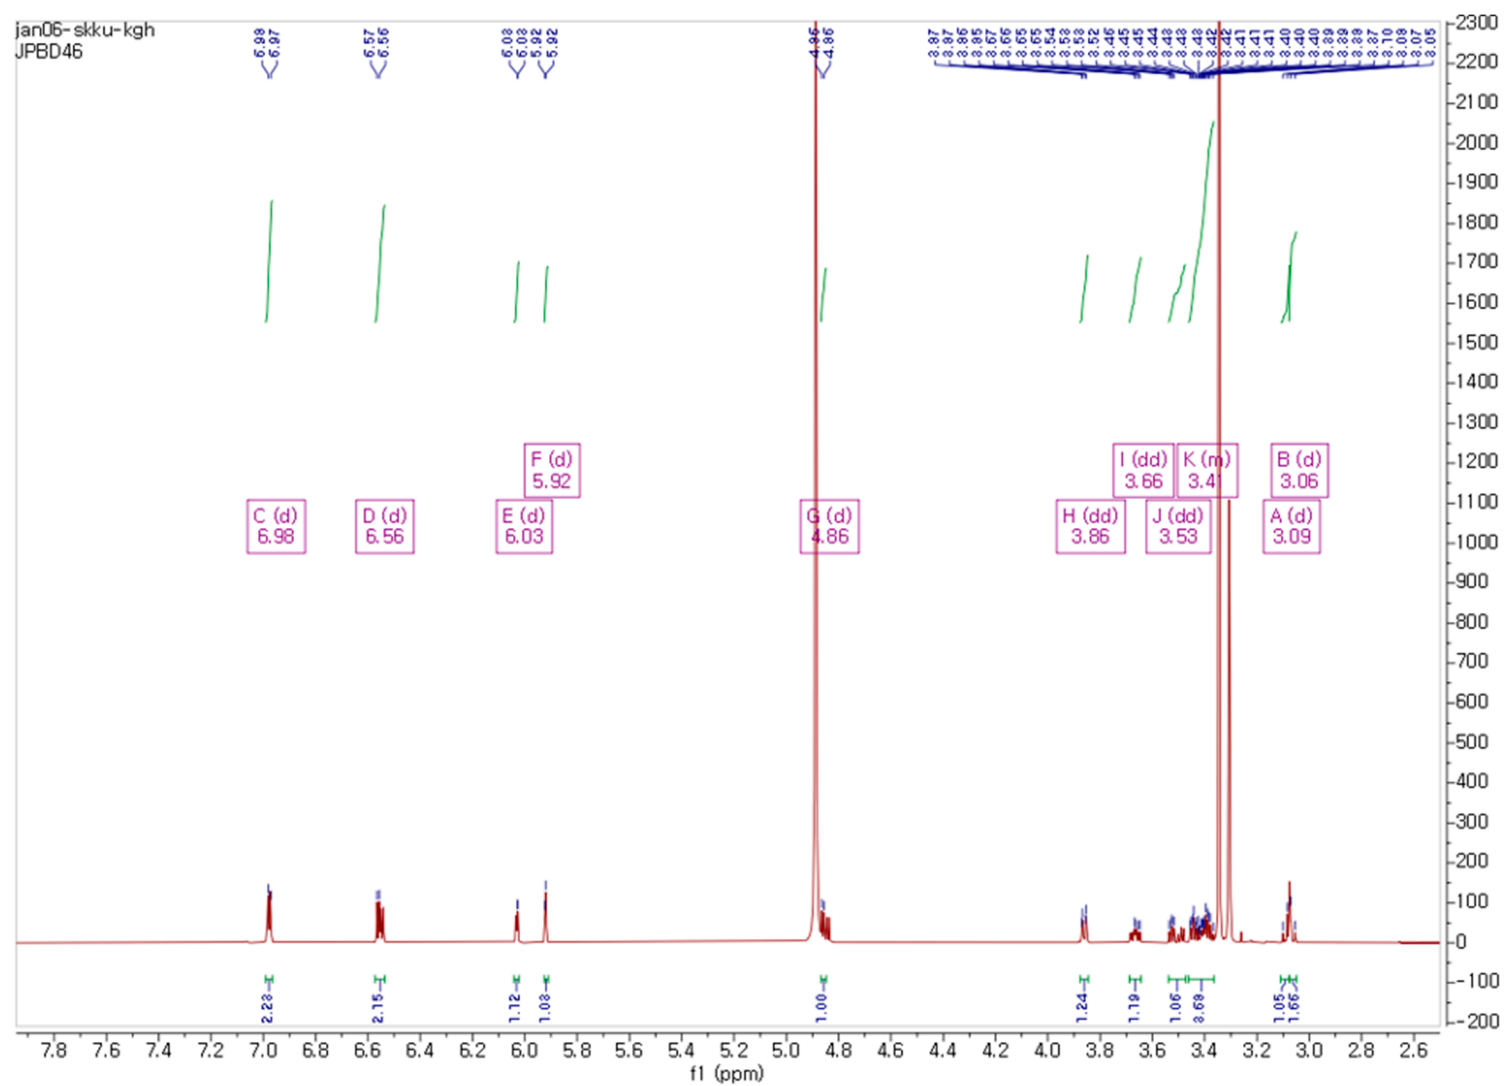

**Figure S4.** The HSQC spectrum of **1** (CD<sub>3</sub>OD)

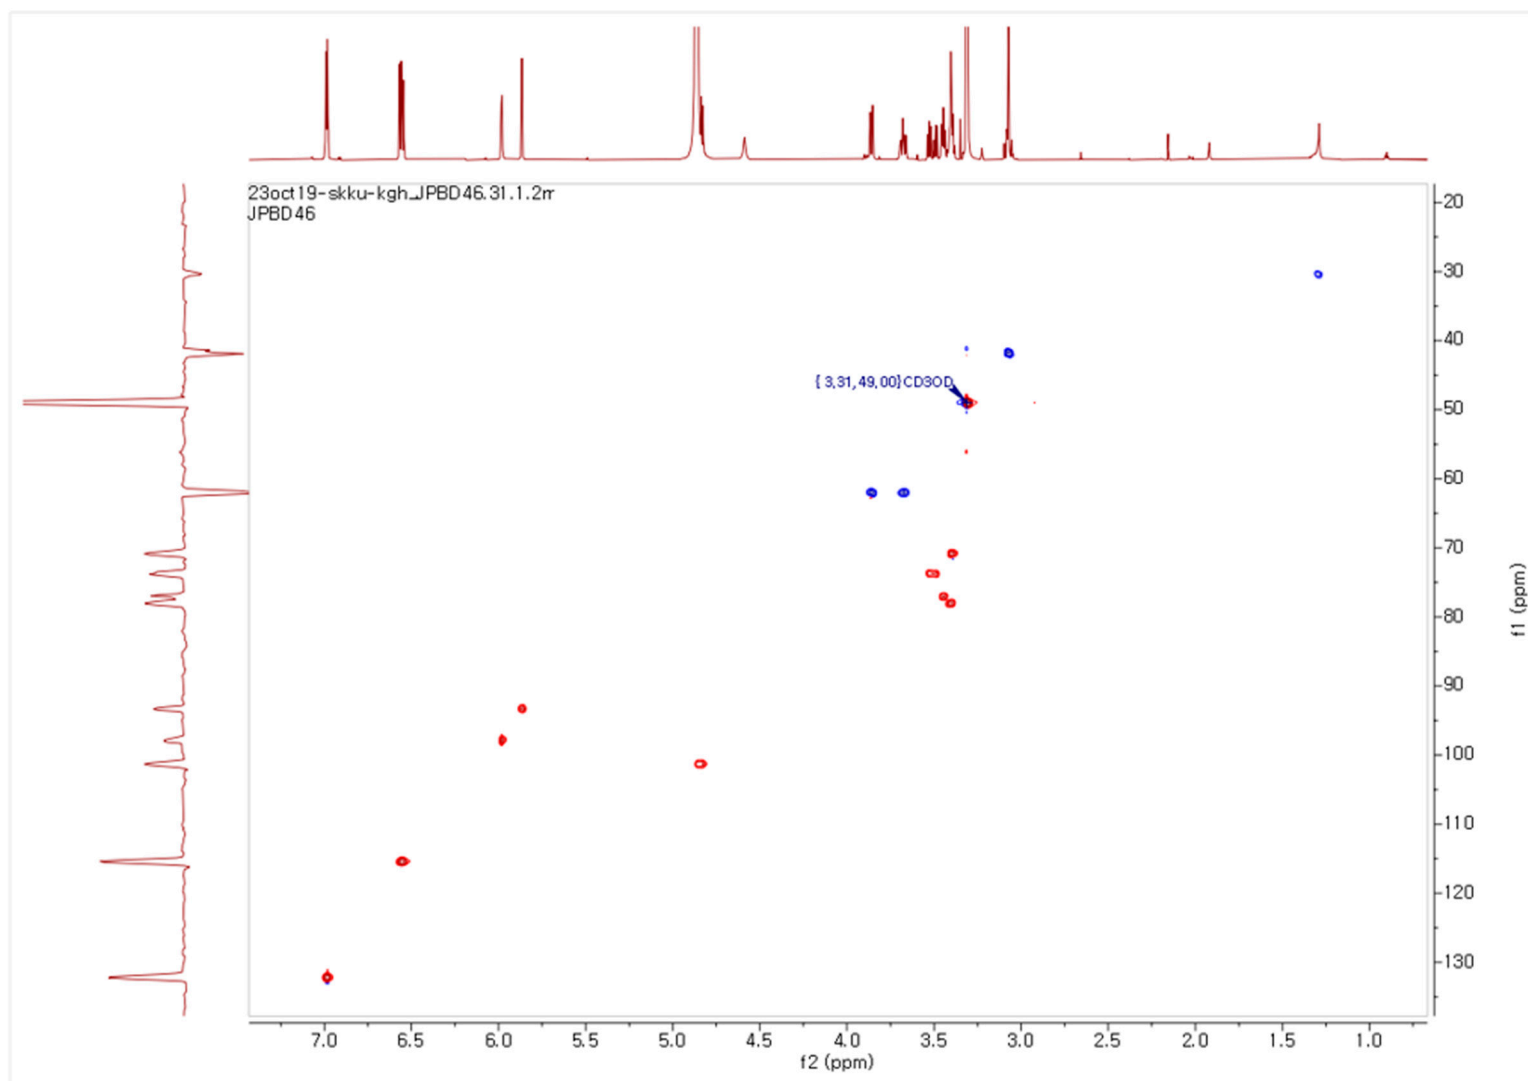

**Figure S5.** The HMBC spectrum of **1** (CD<sub>3</sub>OD)

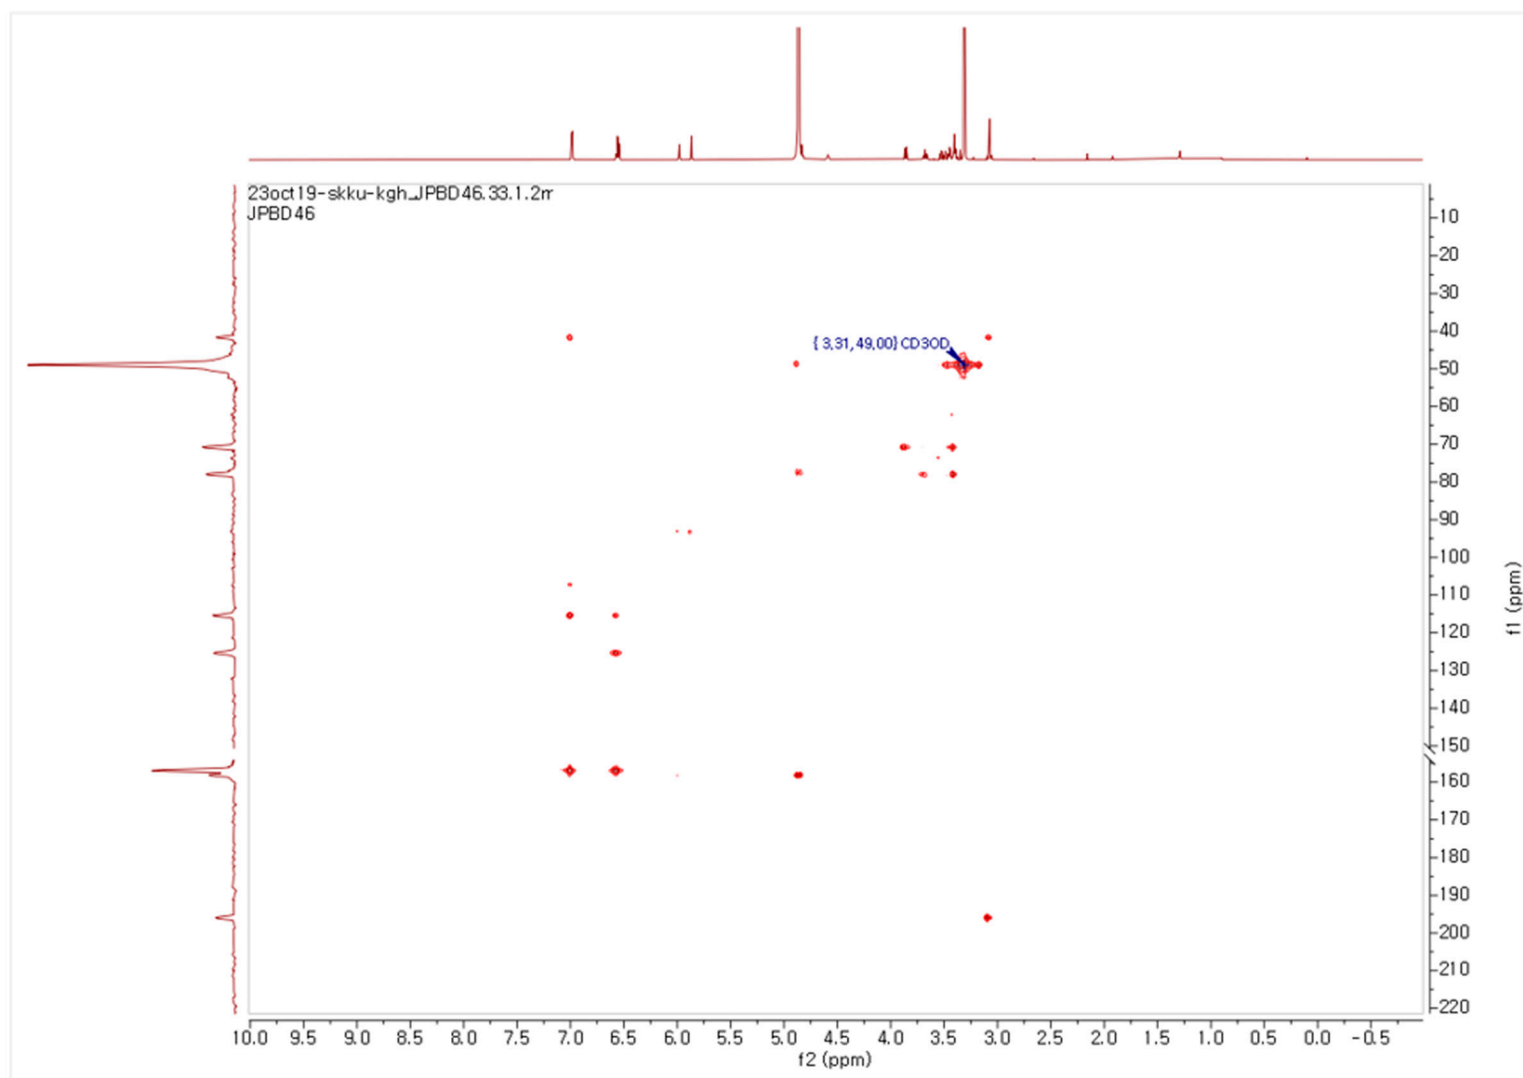

**Figure S6.** UV chromatogram of LC/MS, and UV and MS data for compound **2**

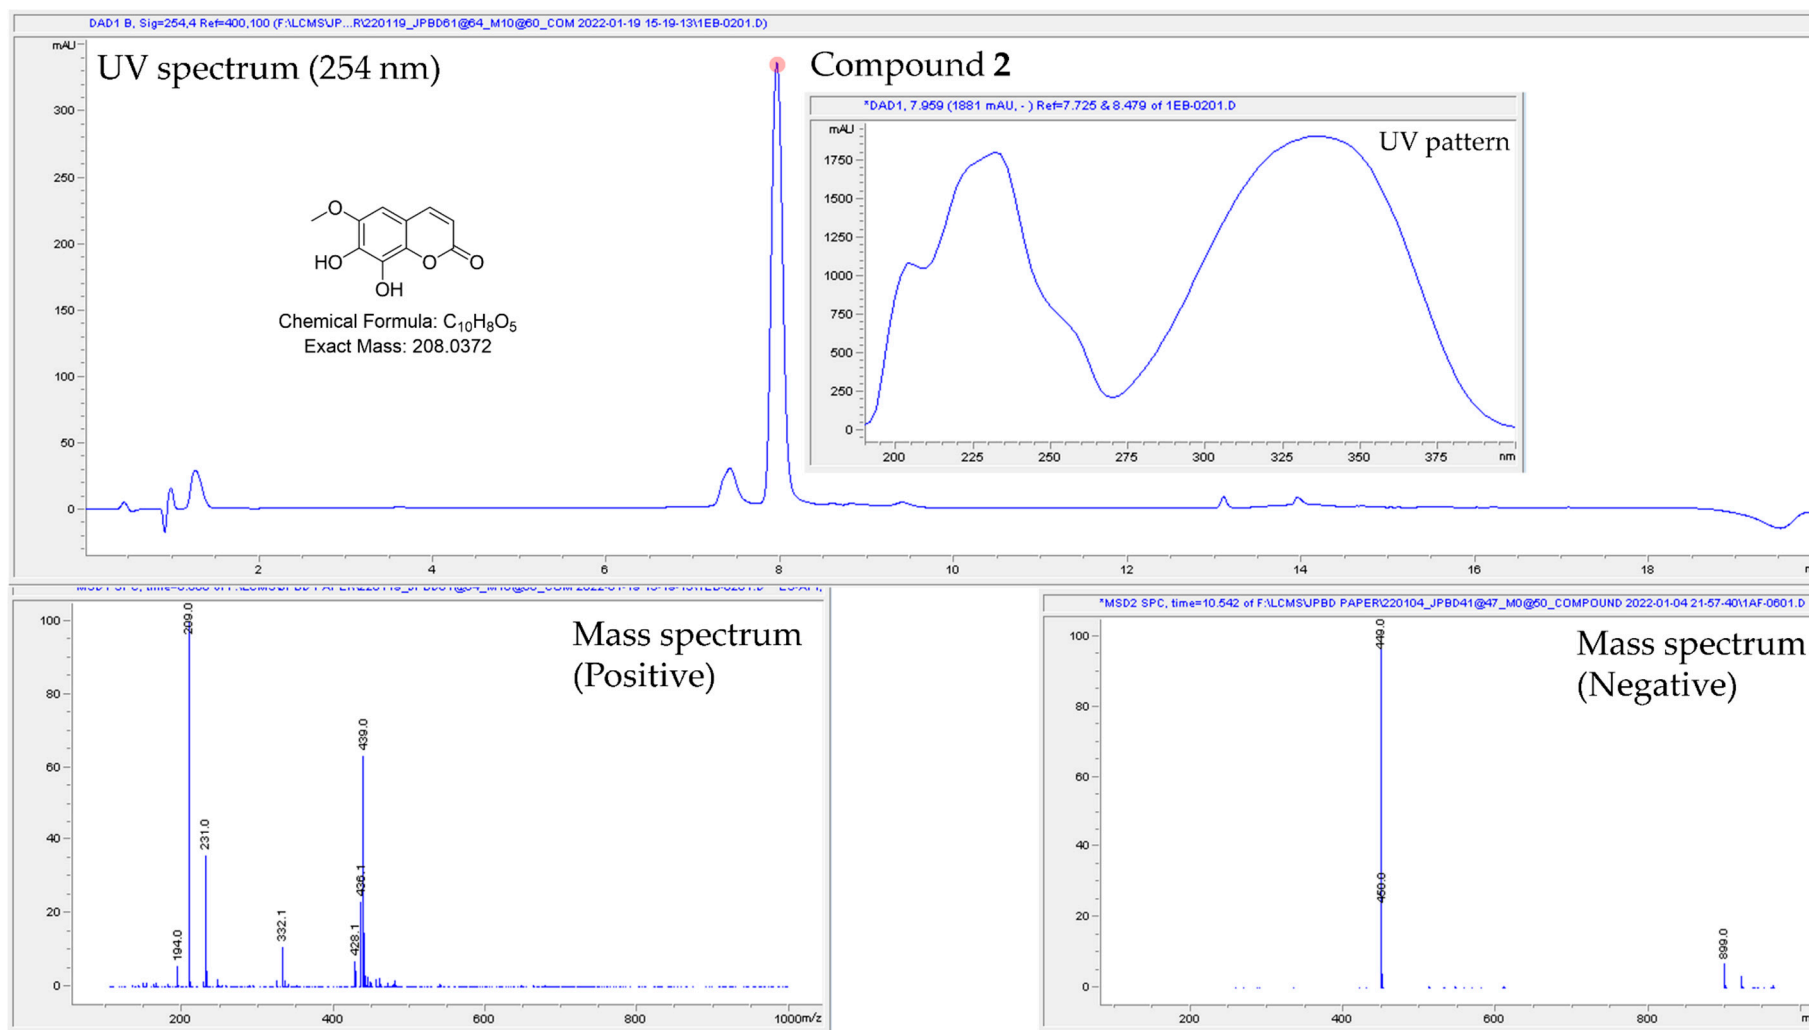



**Figure S7.** The  $^1\text{H}$  NMR spectrum of **2** ( $\text{CD}_3\text{OD}$ , 850 MHz)

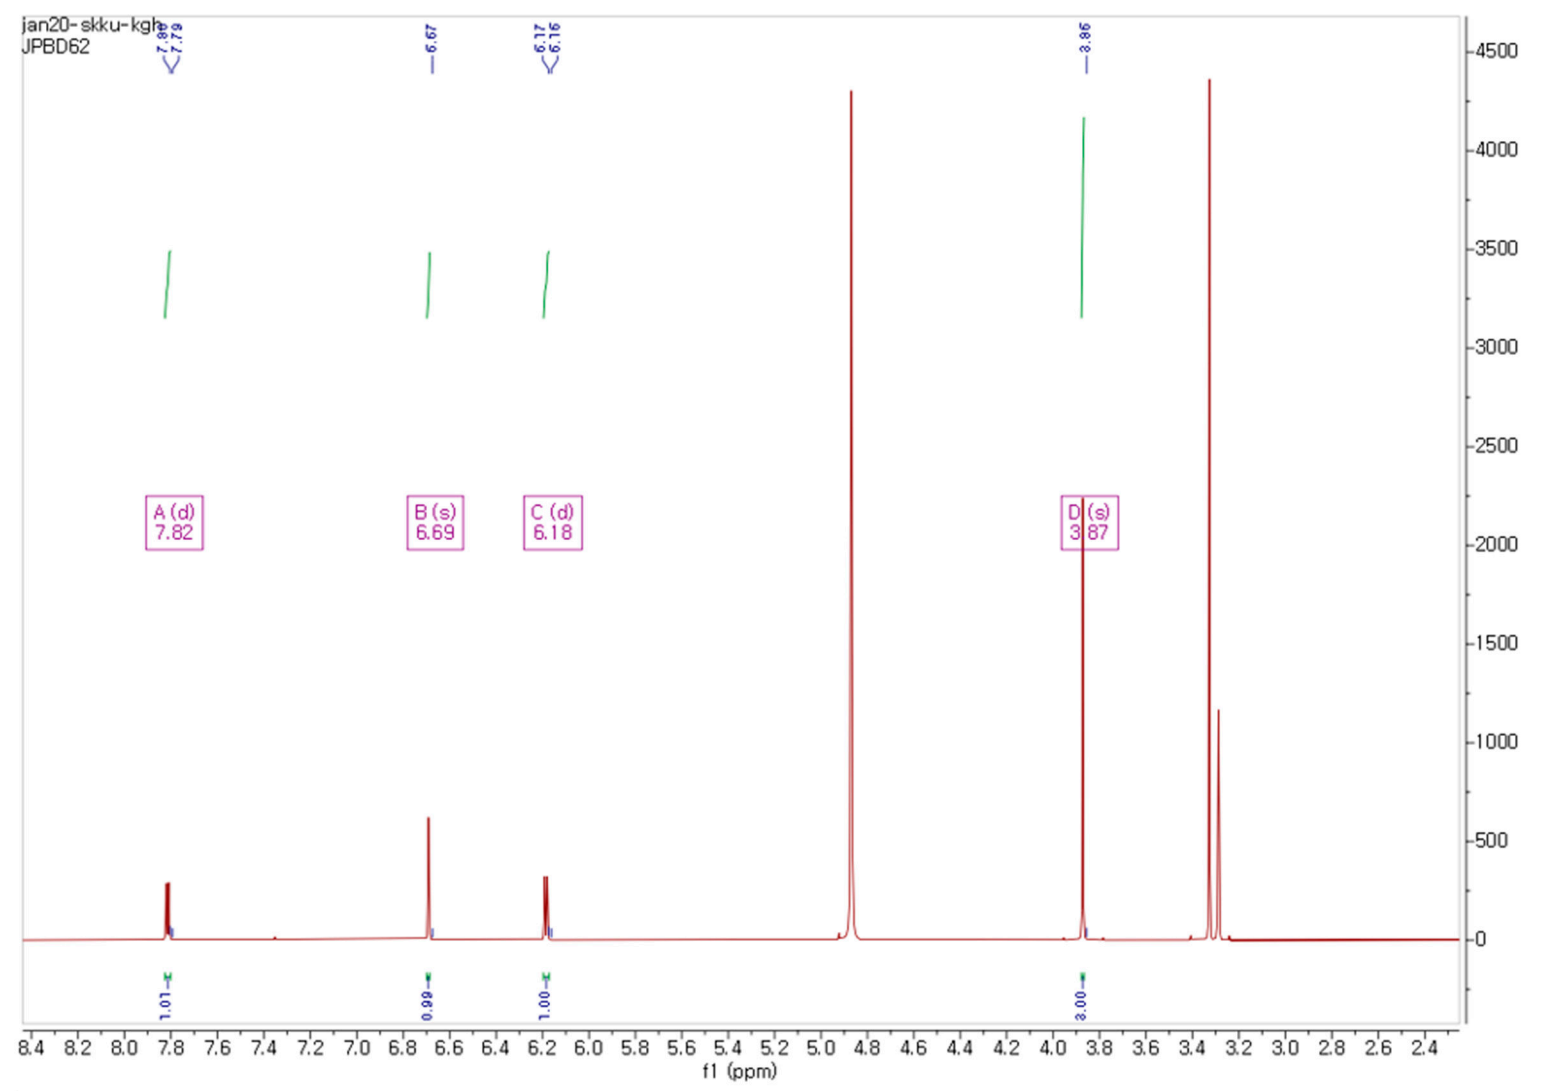

**Figure S8.** UV chromatogram of LC/MS, and UV and MS data for compound **3**

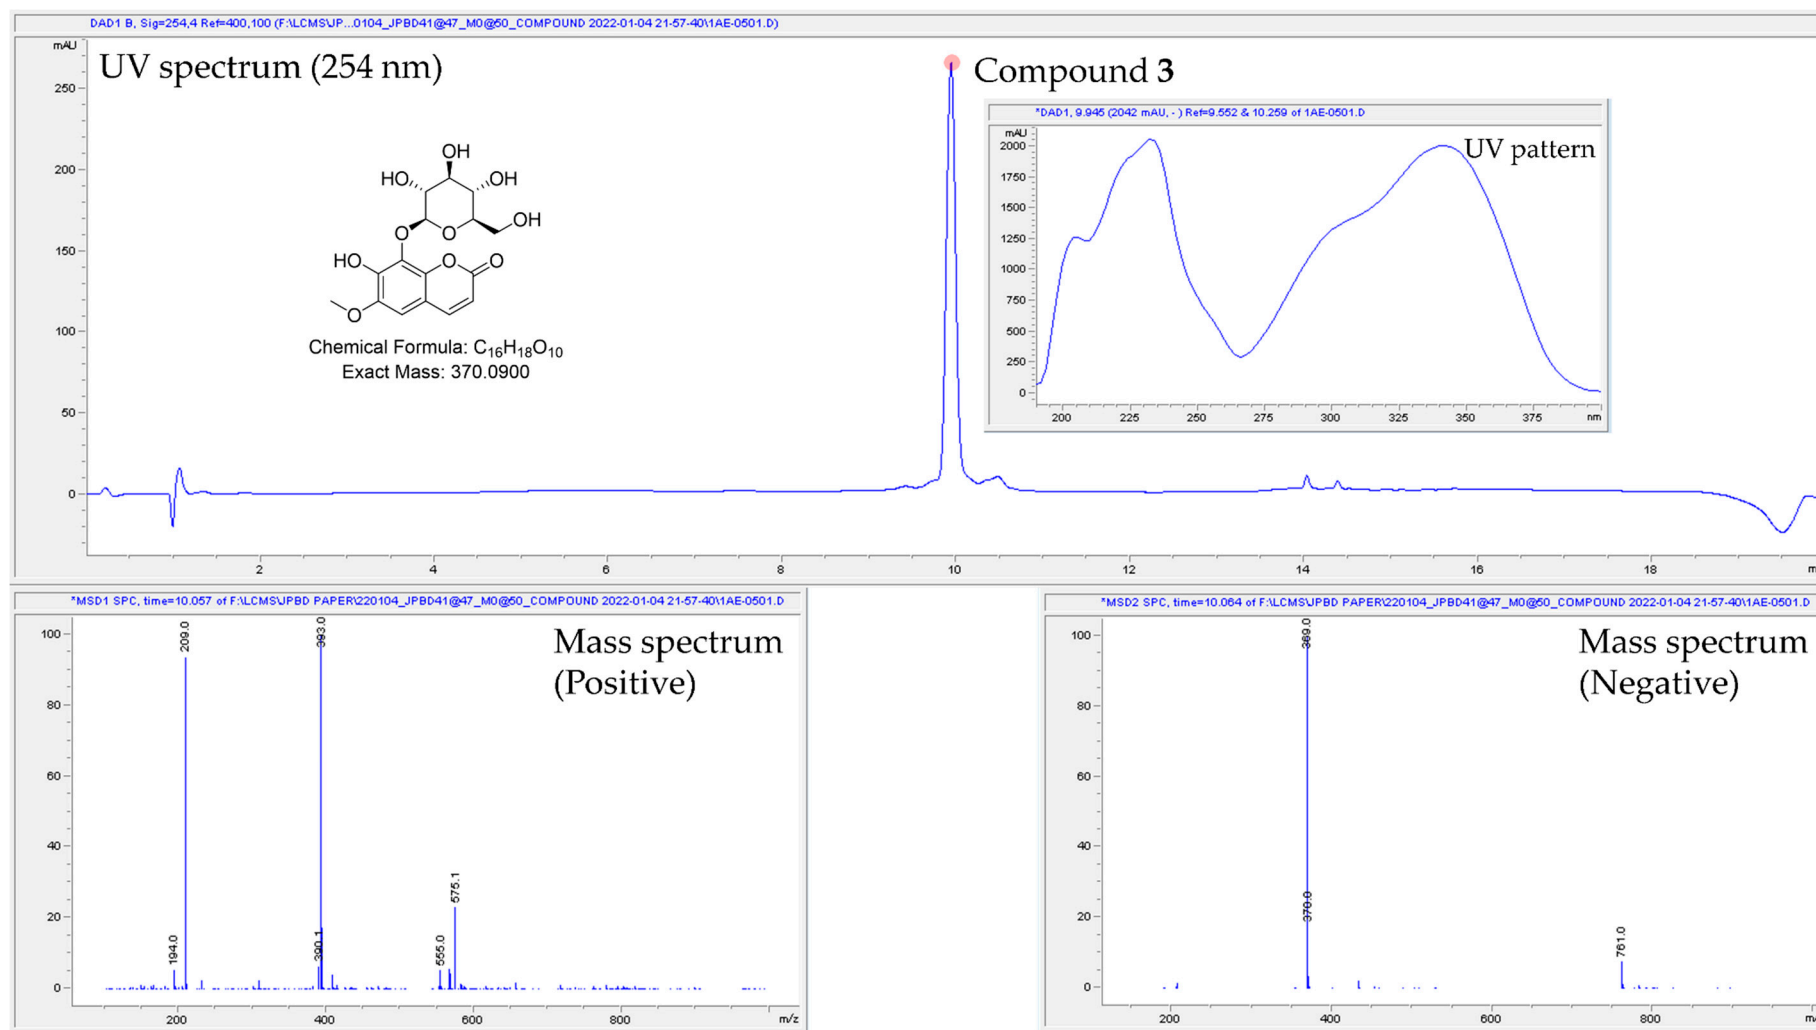

1H NMR spectrum of compound 10b in CDCl<sub>3</sub>. The spectrum shows peaks from 2.4 to 8.2 ppm. Key peaks are labeled: K (d) at 7.84 ppm, L (s) at 6.94 ppm, M (d) at 6.20 ppm, N (d) at 4.98 ppm, and a cluster of peaks between 3.2 and 3.9 ppm labeled P (dd) at 3.75, S (m) at 3.42, O (s) at 3.86, R (td) at 3.52, T (dq) at 3.24, and Q (dd) at 3.67. Integration values are shown below the baseline: 1.00, 0.95, 0.91, 0.99, 2.01, 1.04, 1.06, 1.05, 2.12, and 1.02. A list of chemical shifts (delta) is provided at the top right: 8.86, 8.76, 8.75, 8.74, 8.67, 8.66, 8.53, 8.52, 8.52, 8.51, 8.42, 8.42, 8.44, 8.35, 8.24, 8.24, 8.24, 8.23.

**Figure S10.** UV chromatogram of LC/MS, and UV and MS data for compound **4**

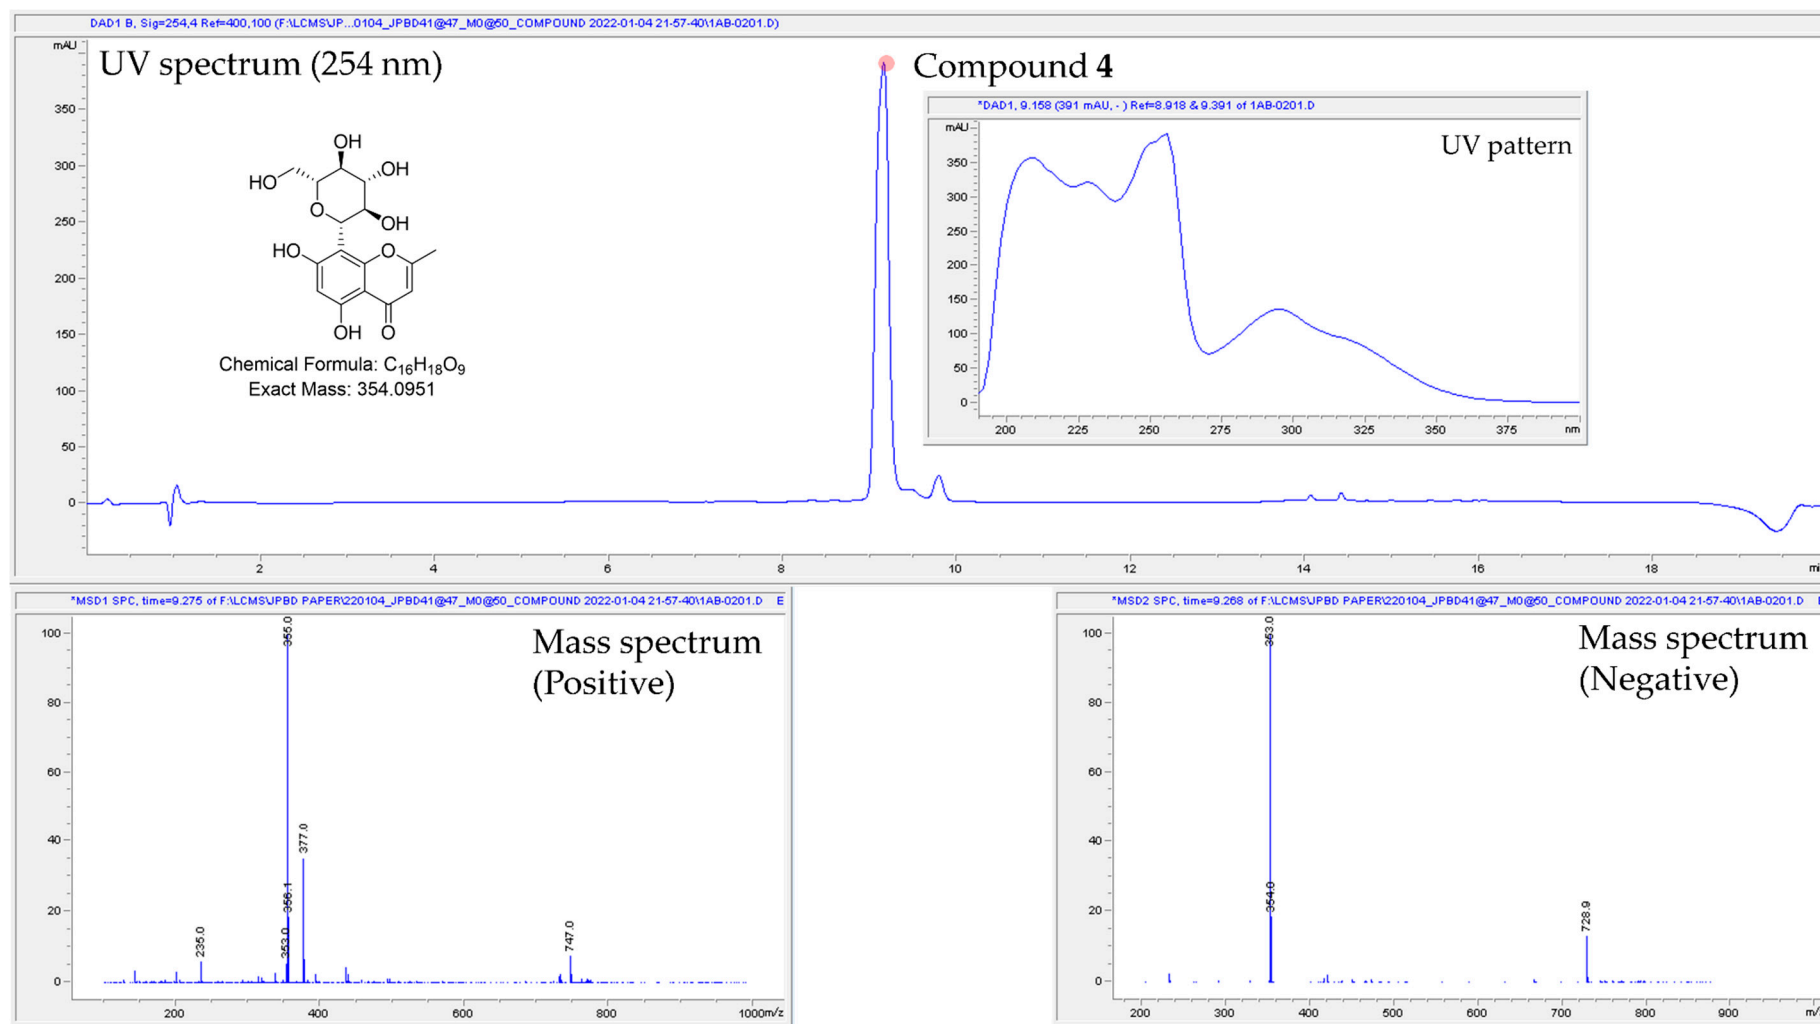

**Figure S11.** The  $^1\text{H}$  NMR spectrum of **4** ( $\text{CD}_3\text{OD}$ , 850 MHz)

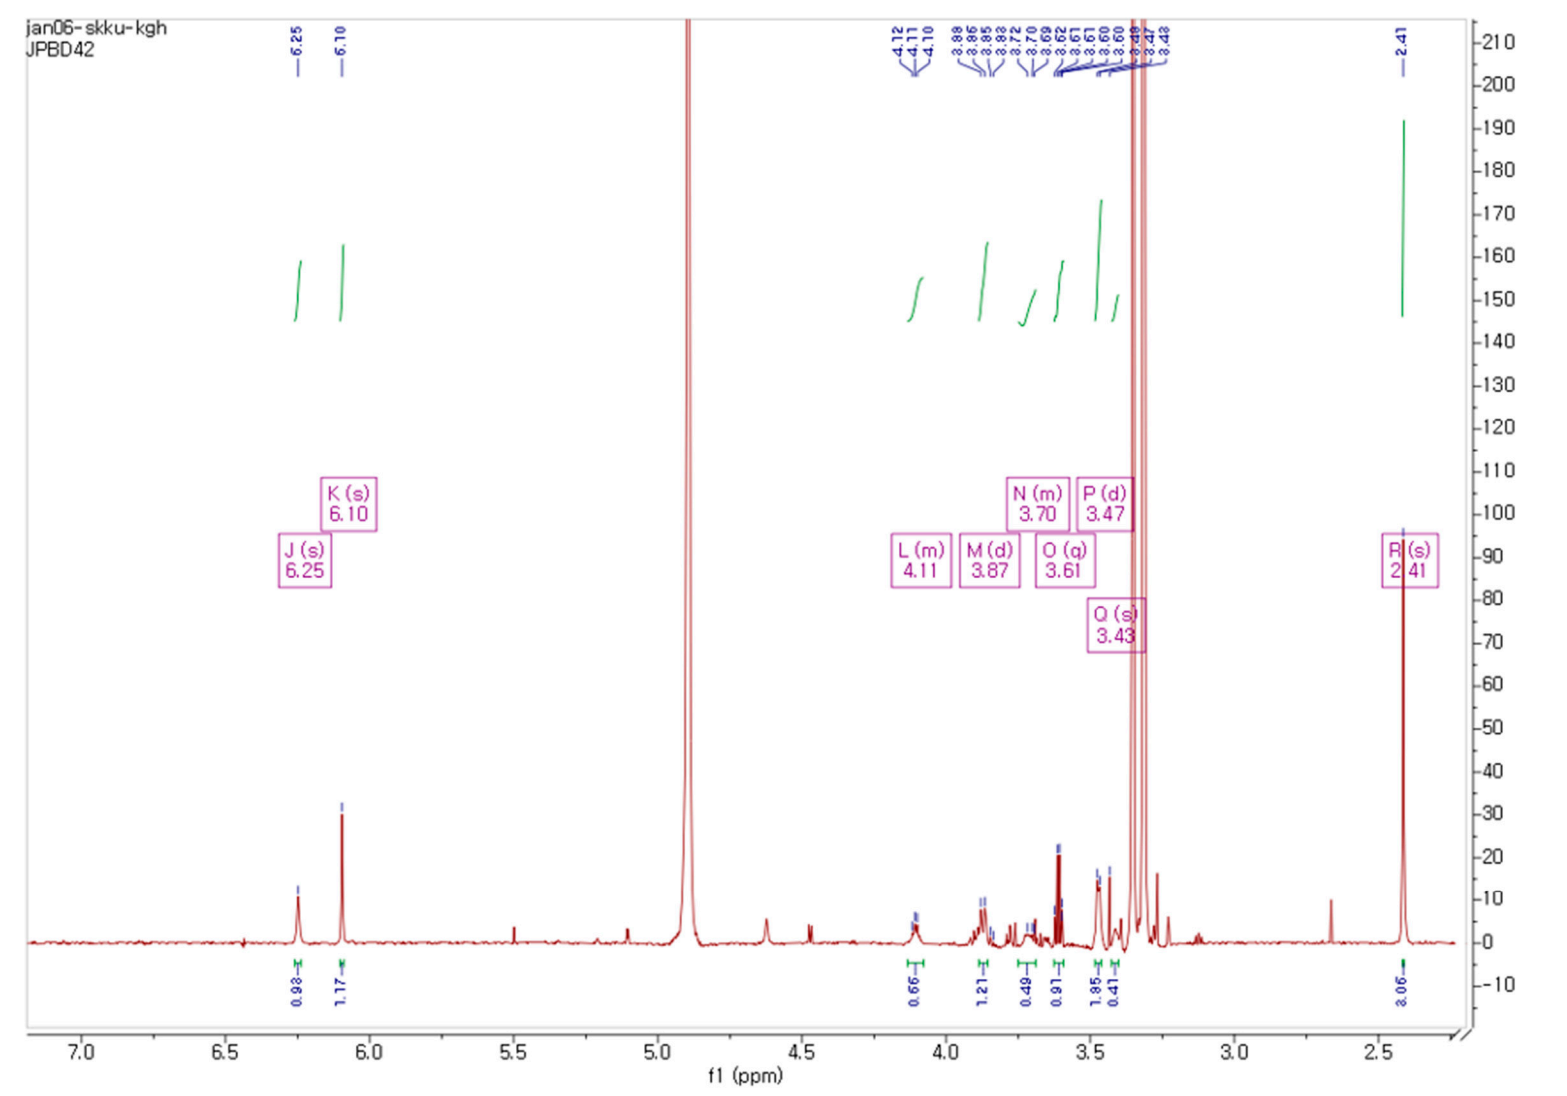

**Figure S12.** UV chromatogram of LC/MS, and UV and MS data for compound **5**

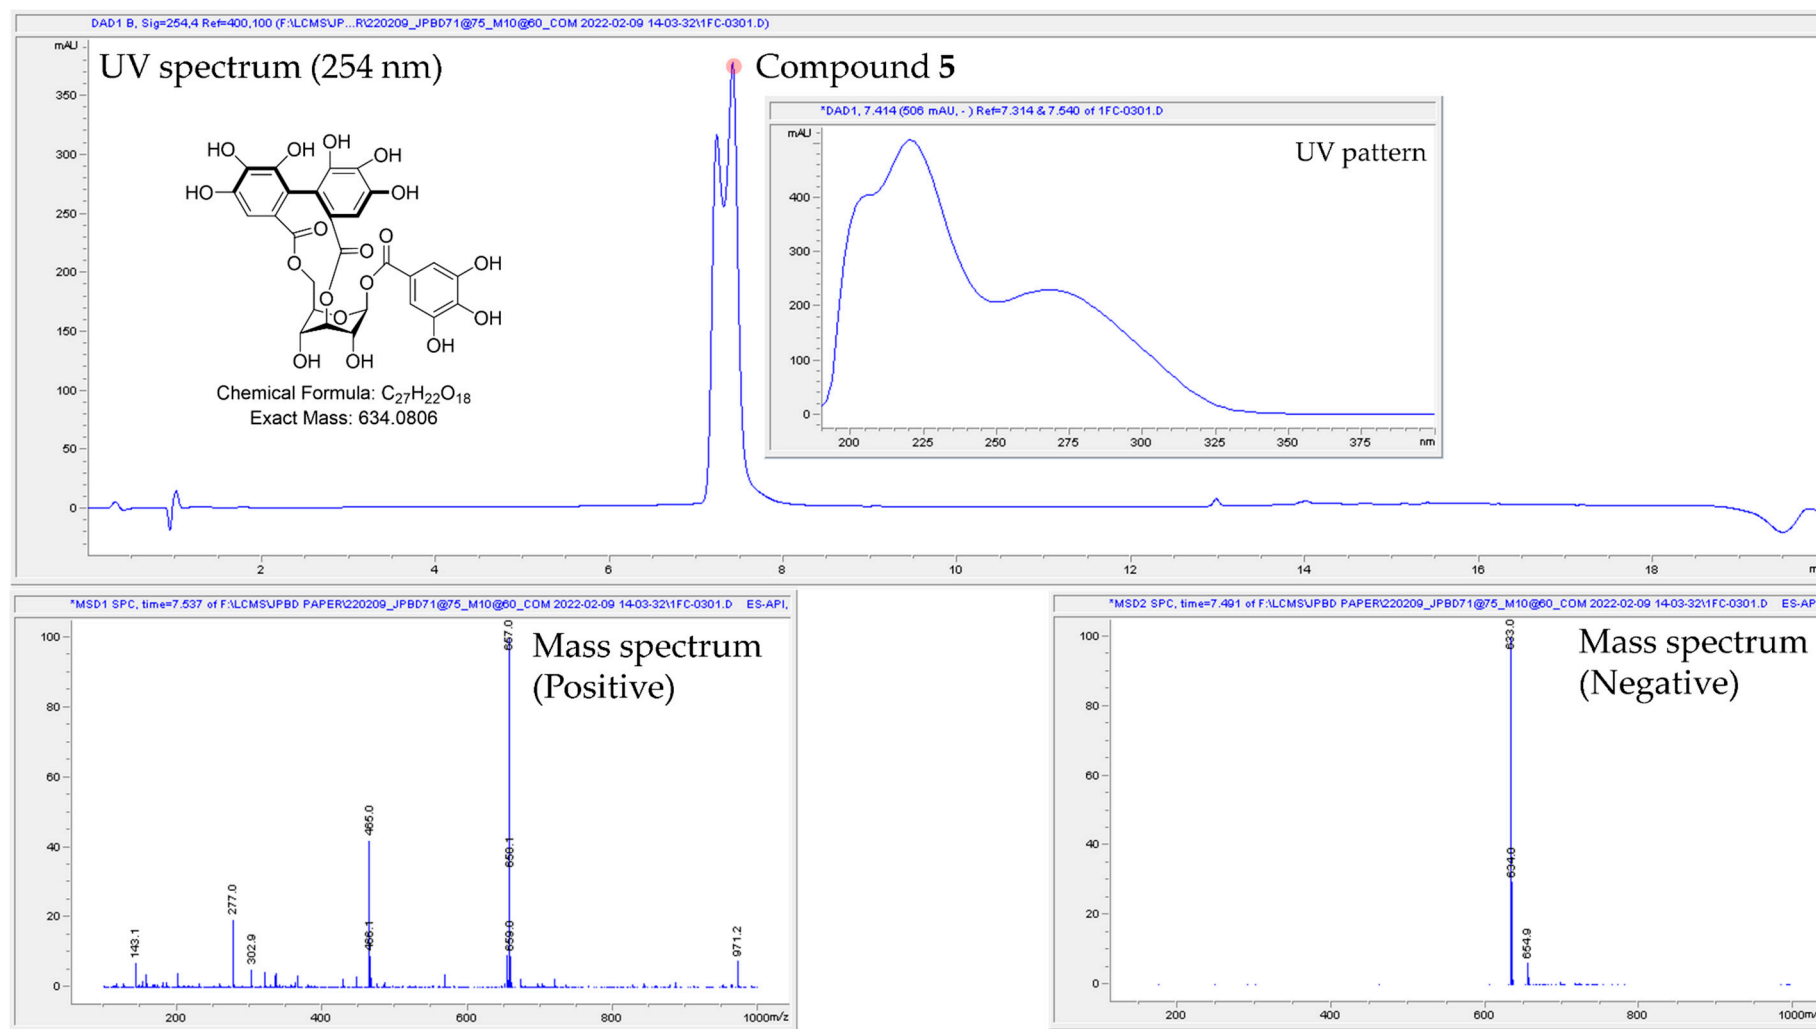

**Figure S13.** The  $^1\text{H}$  NMR spectrum of **5** ( $\text{CD}_3\text{OD}$ , 850 MHz)

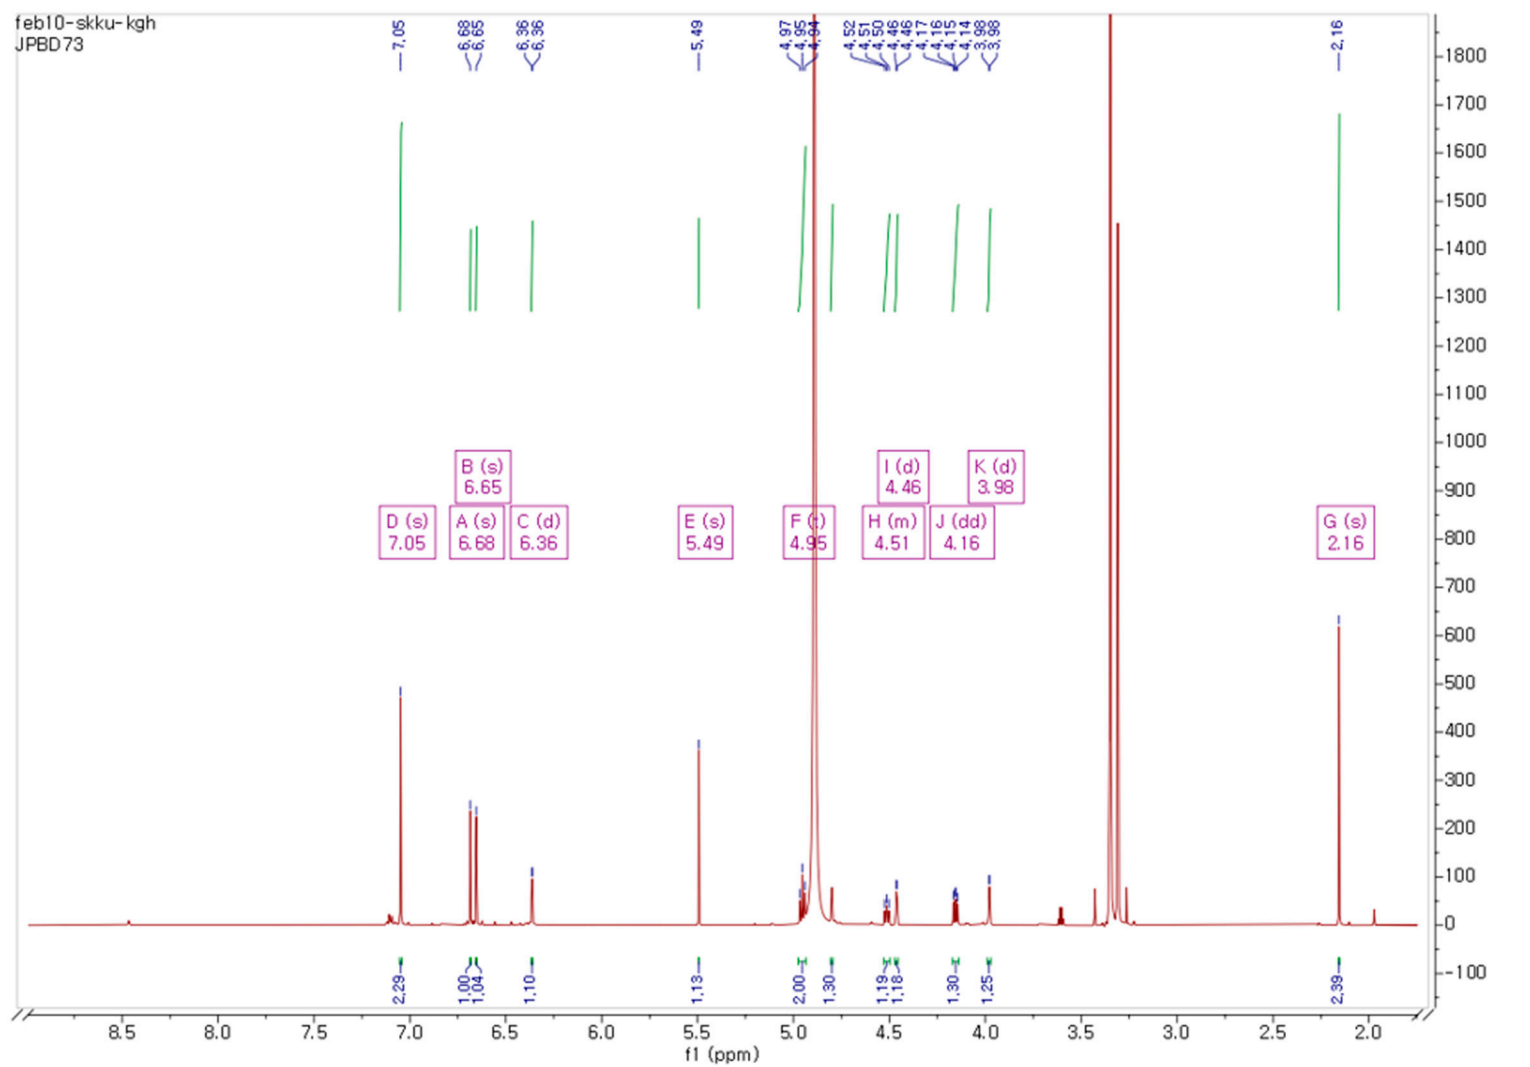

Supplement: s1 [file s1]
